# Supplementary material for: The use of decellularised animal tissue to study disseminating cancer cells
Source: Oxford University Press journal article supplement (doi:10.1242/jcs.219907), 2018-01-01
Supplement: jcs219907supp.pdf [file jcs219907supp.pdf]

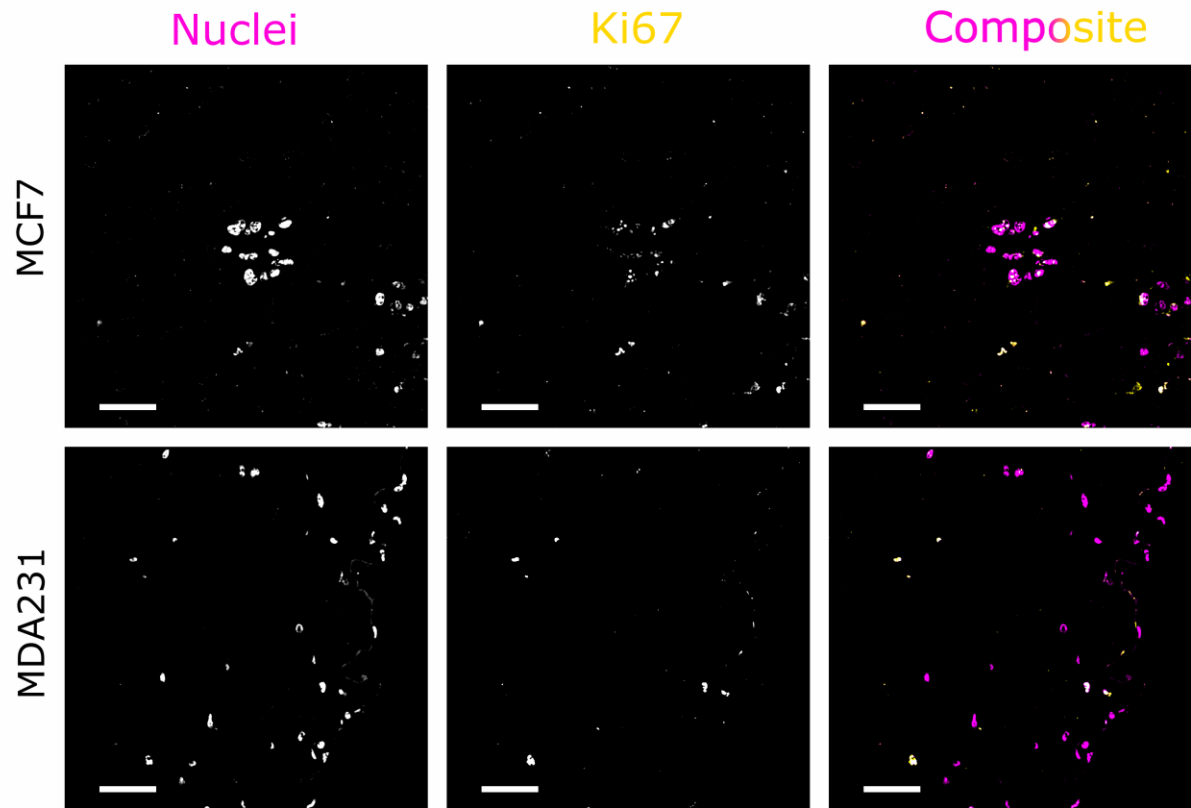

**Figure S1. Ki67 stained preparations of MCF7 and MDA231 cells grown on decellularised rat lung.** Both MCF7 and MDA231 samples had Ki67 positive subpopulations, with stain colocalisation being present on both DNA and in nucleoli. Scale bar 50  $\mu\text{m}$ . n=3.

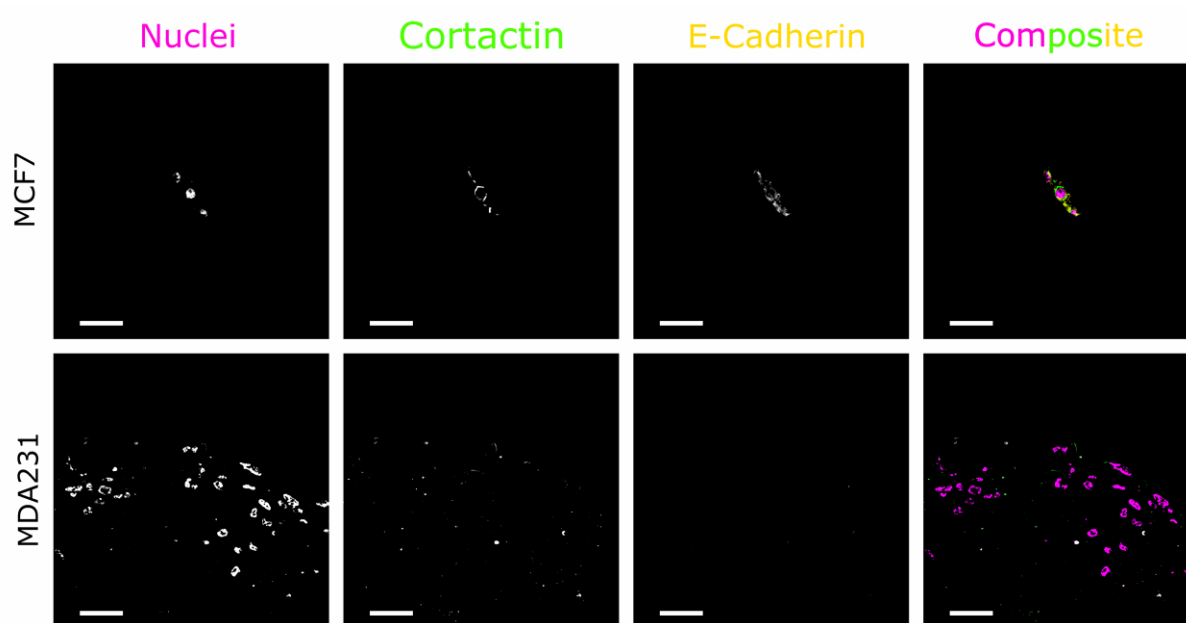

**Figure S2. Cortactin and E-cadherin stained preparations of MCF7 and MDA231 cells grown in decellularised rat lung.** Disambiguation of Figure 6C showing Cortactin and E-cadherin localisation differences in MCF7 and MDA231 cells grown in decellularised rat lung.
